# Supplementary material for: Effects of Production Region, Production Systems and Grape Type/Variety on Nutritional Quality Parameters of Table Grapes; Results from a UK Retail Survey
Source: PubMed Central journal article supplement (PMC7767105; doi:10.3390/foods9121874), 2020-12-16
Supplement: foods-09-01874-s001.pdf [file foods-09-01874-s001.pdf]

**Table S1.** Effect of, and interaction between, production system and table grape variety on the dry matter content (DM), sugar content (SC) of pulp/juice, total phenolic content (TPC), total antioxidant activity (TAA; DPPH & TEAC assays) and total anthocyanin content (TAC) in **white** table grapes produced in South Africa from a UK supermarket survey carried out in 2015 (2-factor ANOVA, the values presented are means  $\pm$  SE)

| Factors                       | Dry Matter content % | Sugar content (SC)       |                           | Total phenolic content (TPC) mg GAE kg <sup>-1</sup> | Antioxidant activity (TAA)        |                                   | Total anthocyanin content (TAC) |                         |
|-------------------------------|----------------------|--------------------------|---------------------------|------------------------------------------------------|-----------------------------------|-----------------------------------|---------------------------------|-------------------------|
|                               |                      | (pulp) Brix <sup>o</sup> | (juice) Brix <sup>o</sup> |                                                      | DPPH $\mu$ mol TE g <sup>-1</sup> | TEAC $\mu$ mol TE g <sup>-1</sup> | mg cyan kg <sup>-1</sup>        | mg mal kg <sup>-1</sup> |
| <b>Production system (PS)</b> |                      |                          |                           |                                                      |                                   |                                   |                                 |                         |
| Organic (n=44)                | 35 $\pm$ 1           | 16.5 $\pm$ 0.4           | 16.3 $\pm$ 0.3            | 1366 $\pm$ 92                                        | 58 $\pm$ 1                        | 5.8 $\pm$ 0.6                     | 3.6 $\pm$ 2.1                   | 4.2 $\pm$ 2.3           |
| Conventional (n=27)           | 36 $\pm$ 1           | 17.5 $\pm$ 0.2           | 17.4 $\pm$ 0.2            | 1173 $\pm$ 60                                        | 56 $\pm$ 1                        | 5.1 $\pm$ 0.4                     | 5.4 $\pm$ 2.0                   | 6.1 $\pm$ 2.2           |
| <b>Variety (Vr)</b>           |                      |                          |                           |                                                      |                                   |                                   |                                 |                         |
| EarlySweet (n=6)              | 33 $\pm$ 1 <b>bc</b> | 16.1 $\pm$ 0.4 <b>bc</b> | 16.2 $\pm$ 0.4 <b>bc</b>  | 1279 $\pm$ 95 <b>b</b>                               | 46 $\pm$ 3 <b>b</b>               | 6.9 $\pm$ 1.2                     | 9.1 $\pm$ 3.2                   | 11.0 $\pm$ 3.3          |
| Prime (n=15)                  | 33 $\pm$ 1 <b>c</b>  | 15.6 $\pm$ 0.3 <b>c</b>  | 15.7 $\pm$ 0.3 <b>b</b>   | 1248 $\pm$ 54 <b>b</b>                               | 55 $\pm$ 2 <b>a</b>               | 5.3 $\pm$ 0.3                     | 4.9 $\pm$ 2.1                   | 5.9 $\pm$ 2.3           |
| Sugraone (n=22)               | 36 $\pm$ 1 <b>b</b>  | 17.0 $\pm$ 0.4 <b>b</b>  | 17.0 $\pm$ 0.4 <b>a</b>   | 1701 $\pm$ 75 <b>a</b>                               | 60 $\pm$ 1 <b>a</b>               | 5.0 $\pm$ 0.7                     | 3.3 $\pm$ 3.5                   | 3.9 $\pm$ 3.8           |
| Thompson (n=28)               | 37 $\pm$ 1 <b>a</b>  | 18.2 $\pm$ 0.2 <b>a</b>  | 17.8 $\pm$ 0.3 <b>a</b>   | 882 $\pm$ 46 <b>c</b>                                | 57 $\pm$ 2 <b>a</b>               | 5.4 $\pm$ 0.6                     | 4.8 $\pm$ 2.3                   | 5.0 $\pm$ 2.4           |
| <b>ANOVA (p-values)</b>       |                      |                          |                           |                                                      |                                   |                                   |                                 |                         |
| <i>Main effects</i>           |                      |                          |                           |                                                      |                                   |                                   |                                 |                         |
| PS                            | NS                   | <b>0.0400</b>            | <b>0.0254</b>             | <b>0.0108</b>                                        | NS                                | NS                                | NS                              | NS                      |
| Vr                            | <b>0.0002</b>        | <b>&lt;0.0001</b>        | <b>0.0005</b>             | <b>&lt;0.0001</b>                                    | <b>0.0002</b>                     | NS                                | NS                              | NS                      |
| <i>Interactions*</i>          |                      |                          |                           |                                                      |                                   |                                   |                                 |                         |
| PS:Vr                         | NS                   | NS                       | NS                        | <b>0.0110<sup>1</sup></b>                            | NS                                | NS                                | NS                              | NS                      |

GAE, Gallic acid equivalent; TE, Trolox equivalent; cyan, cyanidin 3-glucoside equivalent; mal, malvidin 3-glucoside equivalent; *p*-values in *italic* are for trends (0.1 < *p* < 0.05); \* only interactions for which significant results were detected are shown; <sup>1</sup> see Table S1.1 for interaction means  $\pm$  SE;

**Table S1.1** Interactions means  $\pm$  SE for the effects of grape variety and production system on the total phenolic content in table grapes.

| Parameter                                         | Factor 1      | Factor 2                |                          |
|---------------------------------------------------|---------------|-------------------------|--------------------------|
|                                                   | Grape Variety | Production System       |                          |
|                                                   |               | Organic                 | Conventional             |
| Total phenolic content (mg GAE kg <sup>-1</sup> ) | Early Sweet   | 1180 $\pm$ 19 <b>aB</b> | 1328 $\pm$ 142 <b>aA</b> |
|                                                   | Prime         | 1088 $\pm$ 72 <b>bB</b> | 1388 $\pm$ 35 <b>aA</b>  |
|                                                   | Sugraone      | 1845 $\pm$ 87 <b>aA</b> | 1556 $\pm$ 109 <b>bA</b> |
|                                                   | Thompson      | 943 $\pm$ 113 <b>aB</b> | 861 $\pm$ 49 <b>aB</b>   |

GAE, Gallic acid equivalent; For each parameter assessed means labelled with the same lower case letter within the same row and the same capital letters within the same column are not significant different (General Linear Hypothesis test *p* < 0.05).

**Table S2.** Effect of, and interaction between, production system and table grape variety on the dry matter content (DM), sugar content (SC) of pulp/juice, total phenolic content (TPC), total antioxidant activity (TAA; DPPH & TEAC assays) and total anthocyanin content (TAC) in **red** table grapes produced in South Africa from a UK supermarket survey carried out in 2015 (2-factor ANOVA, the values presented are means  $\pm$  SE

| Factors                        | Dry Matter content % | Sugar content (SC)       |                           | Total phenolic content (TPC) mg GAE kg <sup>-1</sup> | Antioxidant activity (TAA)        |                                   | Total anthocyanin content (TAC) |                         |
|--------------------------------|----------------------|--------------------------|---------------------------|------------------------------------------------------|-----------------------------------|-----------------------------------|---------------------------------|-------------------------|
|                                |                      | (pulp) Brix <sup>o</sup> | (juice) Brix <sup>o</sup> |                                                      | DPPH $\mu$ mol TE g <sup>-1</sup> | TEAC $\mu$ mol TE g <sup>-1</sup> | mg cyan kg <sup>-1</sup>        | mg mal kg <sup>-1</sup> |
| <b>Production System (PS)</b>  |                      |                          |                           |                                                      |                                   |                                   |                                 |                         |
| Organic (n=28)                 | 40 $\pm$ 1           | 18.8 $\pm$ 0.3           | 19.1 $\pm$ 0.3            | 1777 $\pm$ 75                                        | 96 $\pm$ 5                        | 8.5 $\pm$ 1.1                     | 99 $\pm$ 10                     | 104 $\pm$ 11            |
| Conventional (n=29)            | 39 $\pm$ 1           | 18.4 $\pm$ 0.3           | 18.3 $\pm$ 0.3            | 1471 $\pm$ 73                                        | 88 $\pm$ 4                        | 5.3 $\pm$ 0.7                     | 120 $\pm$ 12                    | 127 $\pm$ 13            |
| <b>Variety (Vr)</b>            |                      |                          |                           |                                                      |                                   |                                   |                                 |                         |
| Allison (n=8)                  | 40 $\pm$ 1           | 18.5 $\pm$ 0.4           | 18.9 $\pm$ 0.4 <b>ab</b>  | 1845 $\pm$ 63 <b>a</b>                               | 100 $\pm$ 3 <b>ab</b>             | 4.6 $\pm$ 0.3 <b>b</b>            | 126 $\pm$ 28                    | 133 $\pm$ 30            |
| Crimson (n=25)                 | 39 $\pm$ 1           | 18.7 $\pm$ 0.3           | 18.6 $\pm$ 0.3 <b>ab</b>  | 1325 $\pm$ 44 <b>b</b>                               | 96 $\pm$ 1 <b>b</b>               | 6.2 $\pm$ 0.7 <b>b</b>            | 117 $\pm$ 14                    | 124 $\pm$ 14            |
| Flame (n=10)                   | 37 $\pm$ 1           | 17.6 $\pm$ 0.5           | 17.7 $\pm$ 0.4 <b>b</b>   | 1903 $\pm$ 184 <b>a</b>                              | 52 $\pm$ 1 <b>c</b>               | 2.7 $\pm$ 0.3 <b>b</b>            | 96 $\pm$ 16                     | 101 $\pm$ 17            |
| Sweet Celebration (n=14)       | 41 $\pm$ 1           | 19.3 $\pm$ 0.5           | 19.4 $\pm$ 0.4 <b>a</b>   | 1821 $\pm$ 92 <b>a</b>                               | 109 $\pm$ 5 <b>a</b>              | 12.0 $\pm$ 1.7 <b>a</b>           | 96 $\pm$ 11                     | 101 $\pm$ 12            |
| <b>ANOVA (<i>p</i>-values)</b> |                      |                          |                           |                                                      |                                   |                                   |                                 |                         |
| <i>Main effects</i>            |                      |                          |                           |                                                      |                                   |                                   |                                 |                         |
| PS                             | NS                   | NS                       | <b>0.0407</b>             | <b>0.0038</b>                                        | <b>0.0166</b>                     | <b>0.0113</b>                     | NS                              | NS                      |
| Vr                             | NS                   | NS                       | NS                        | <b>0.0008</b>                                        | <b>&lt;.0001</b>                  | <b>0.0001</b>                     | NS                              | NS                      |
| <i>Interactions*</i>           |                      |                          |                           |                                                      |                                   |                                   |                                 |                         |
| PS:Vr                          | NS                   | NS                       | NS                        | NS                                                   | NS                                | NS                                | NS                              | NS                      |

**GAE**, Gallic acid equivalent; **TE**, Trolox equivalent; **cyan**, cyanidin 3-glucoside equivalent; **mal**, malvidin 3-glucoside equivalent; *p*-values in *italic* are for trends (0.1 < *p* < 0.05); only interactions for which significant results were detected are shown;

**Table S3.** Effect of, and interaction between, production system and table grape variety on the dry matter content (DM), sugar content (SC) of pulp/juice, total phenolic content (TPC), total antioxidant activity (TAA; DPPH & TEAC assays) and total anthocyanin content (TAC) in **red** table grapes produced in Mediterranean countries from a UK supermarket survey carried out in 2015 (2-factor ANOVA, the values presented are means  $\pm$  SE)

| Factors                       | Dry Matter content % | Sugar content (SC)        |                           | Total phenolic content (TPC) mg GAE kg <sup>-1</sup> | Antioxidant activity (TAA)        |                                   | Total anthocyanin content (TAC) |                         |
|-------------------------------|----------------------|---------------------------|---------------------------|------------------------------------------------------|-----------------------------------|-----------------------------------|---------------------------------|-------------------------|
|                               |                      | (pulp) Brix <sup>o</sup>  | (juice) Brix <sup>o</sup> |                                                      | DPPH $\mu$ mol TE g <sup>-1</sup> | TEAC $\mu$ mol TE g <sup>-1</sup> | mg cyan kg <sup>-1</sup>        | mg mal kg <sup>-1</sup> |
| <b>Production system (PS)</b> |                      |                           |                           |                                                      |                                   |                                   |                                 |                         |
| ORG (n=30)                    | 37 $\pm$ 1           | 17.7 $\pm$ 0.3            | 17.9 $\pm$ 0.3            | 2170 $\pm$ 141                                       | 110 $\pm$ 6                       | 9.3 $\pm$ 0.9                     | 62 $\pm$ 7                      | 66 $\pm$ 8              |
| CON (n=30)                    | 37 $\pm$ 1           | 17.5 $\pm$ 0.2            | 17.9 $\pm$ 0.3            | 1955 $\pm$ 109                                       | 111 $\pm$ 7                       | 9.5 $\pm$ 1.1                     | 101 $\pm$ 17                    | 106 $\pm$ 18            |
| <b>Variety (Vr)</b>           |                      |                           |                           |                                                      |                                   |                                   |                                 |                         |
| Allison (n=4)                 | 37 $\pm$ 2           | 17.7 $\pm$ 0.8 <b>ab</b>  | 18.5 $\pm$ 0.7 <b>ab</b>  | 1913 $\pm$ 288 <b>ab</b>                             | 99 $\pm$ 5 <b>b</b>               | 9.0 $\pm$ 1.7 <b>ab</b>           | 83 $\pm$ 31                     | 88 $\pm$ 33             |
| Crimson (n=33)                | 37 $\pm$ 1           | 17.1 $\pm$ 0.2 <b>b</b>   | 17.5 $\pm$ 0.2 <b>b</b>   | 1930 $\pm$ 80 <b>b</b>                               | 105 $\pm$ 4 <b>b</b>              | 9.1 $\pm$ 0.7 <b>b</b>            | 81 $\pm$ 11                     | 86 $\pm$ 12             |
| Flame (n=10)                  | 33 $\pm$ 4           | 17.8 $\pm$ 0.4 <b>ab</b>  | 18.0 $\pm$ 0.5 <b>ab</b>  | 2640 $\pm$ 276 <b>a</b>                              | 151 $\pm$ 16 <b>a</b>             | 15.0 $\pm$ 2.8 <b>a</b>           | 85 $\pm$ 9                      | 90 $\pm$ 9              |
| Scarlotta (n=13)              | 38 $\pm$ 1           | 18.5 $\pm$ 0.5 <b>a</b>   | 18.7 $\pm$ 0.4 <b>a</b>   | 2005 $\pm$ 250 <b>b</b>                              | 96 $\pm$ 4 <b>b</b>               | 6.1 $\pm$ 0.6 <b>b</b>            | 79 $\pm$ 34                     | 83 $\pm$ 36             |
| <b>ANOVA (p-values)</b>       |                      |                           |                           |                                                      |                                   |                                   |                                 |                         |
| <i>Main effects</i>           |                      |                           |                           |                                                      |                                   |                                   |                                 |                         |
| PS                            | NS                   | NS                        | NS                        | NS                                                   | NS                                | NS                                | NS                              | NS                      |
| Vr                            | NS                   | <b>0.0284</b>             | <b>0.0448</b>             | <b>0.0338</b>                                        | <b>0.0008</b>                     | <b>0.0028</b>                     | NS                              | NS                      |
| <i>Interactions</i>           |                      |                           |                           |                                                      |                                   |                                   |                                 |                         |
| *                             |                      |                           |                           |                                                      |                                   |                                   |                                 |                         |
| PS:Vr                         | NS                   | <b>0.0354<sup>1</sup></b> | NS                        | NS                                                   | NS                                | NS                                | NS                              | NS                      |

GAE, Gallic acid equivalent; TE, Trolox equivalent; **cyan**, cyanidin 3-glucoside equivalent; **mal**, malvidin 3-glucoside equivalent; *p*-values in *italic* are for trends (0.1 < *p* < 0.05); \* only interactions for which significant results were detected are shown; <sup>1</sup>see Table S3.1 for interaction means  $\pm$  SE;

**Table S3.1** Interactions means  $\pm$  SE for the effects of grape type and production system on the sugar content in table grapes.

| Parameter                               | Factor 1      | Factor 2<br>Production System |                          |
|-----------------------------------------|---------------|-------------------------------|--------------------------|
|                                         | Grape Variety | Organic                       | Conventional             |
| Sugar content (pulp Brix <sup>o</sup> ) | Allison       | 18.7 $\pm$ 0.9 <b>aA</b>      | 16.7 $\pm$ 1.2 <b>aA</b> |
|                                         | Crimson       | 16.7 $\pm$ 0.3 <b>bB</b>      | 17.4 $\pm$ 0.3 <b>aA</b> |
|                                         | Flame         | 18.4 $\pm$ 0.3 <b>aA</b>      | 17.3 $\pm$ 0.6 <b>aA</b> |
|                                         | Scarlotta     | 18.4 $\pm$ 0.6 <b>aA</b>      | 18.8 $\pm$ 0.5 <b>aB</b> |

For each parameter assessed means labelled with the same lower case letter within the same row and the same capital letters within the same column are not significant different (General Linear Hypothesis test *p* < 0.05).

**Table S4.** Effect of, and interaction between, production system and table grape variety on the dry matter content (DM), sugar content (SC) of pulp/juice, total phenolic content (TPC), total antioxidant activity (TAA; DPPH & TEAC assays) and total anthocyanin content (TAC) in **black** table grapes produced in Mediterranean countries from a UK supermarket survey carried out in 2015 (2-factor ANOVA, the values presented are means  $\pm$  SE)

| Factors                       | Dry Matter content % | Sugar content (SC)       |                           | Total phenolic content (TPC) mg GAE kg <sup>-1</sup> | Antioxidant activity (TAA)        |                                   | Total anthocyanin content (TAC) |                           |
|-------------------------------|----------------------|--------------------------|---------------------------|------------------------------------------------------|-----------------------------------|-----------------------------------|---------------------------------|---------------------------|
|                               |                      | (pulp) Brix <sup>o</sup> | (juice) Brix <sup>o</sup> |                                                      | DPPH $\mu$ mol TE g <sup>-1</sup> | TEAC $\mu$ mol TE g <sup>-1</sup> | mg cyan kg <sup>-1</sup>        | mg mal kg <sup>-1</sup>   |
| <b>Production system (PS)</b> |                      |                          |                           |                                                      |                                   |                                   |                                 |                           |
| Organic (n=9)                 | 34 $\pm$ 2           | 16.5 $\pm$ 0.8           | 17.3 $\pm$ 0.9            | 2746 $\pm$ 316                                       | 139 $\pm$ 11                      | 24 $\pm$ 3                        | 552 $\pm$ 133                   | 582 $\pm$ 140             |
| Conventional (n=11)           | 34 $\pm$ 1           | 16.4 $\pm$ 0.7           | 16.5 $\pm$ 0.6            | 2250 $\pm$ 232                                       | 117 $\pm$ 10                      | 16 $\pm$ 2                        | 426 $\pm$ 60                    | 450 $\pm$ 63              |
| <b>Variety (Vr)</b>           |                      |                          |                           |                                                      |                                   |                                   |                                 |                           |
| Autumn Royal (n=8)            | 33 $\pm$ 1           | 15.0 $\pm$ 0.5b          | 15.5 $\pm$ 0.6 <b>b</b>   | 2069 $\pm$ 362                                       | 109 $\pm$ 5 <b>b</b>              | 15 $\pm$ 2 <b>b</b>               | 237 $\pm$ 54 <b>b</b>           | 250 $\pm$ 57 <b>b</b>     |
| Midnight Beauty (n=12)        | 36 $\pm$ 2           | 17.5 $\pm$ 0.6a          | 17.8 $\pm$ 0.7 <b>a</b>   | 2742 $\pm$ 190                                       | 139 $\pm$ 11 <b>a</b>             | 23 $\pm$ 3 <b>a</b>               | 646 $\pm$ 77 <b>a</b>           | 682 $\pm$ 81 <b>a</b>     |
| <b>ANOVA (p-values)</b>       |                      |                          |                           |                                                      |                                   |                                   |                                 |                           |
| <i>Main effects</i>           |                      |                          |                           |                                                      |                                   |                                   |                                 |                           |
| PS                            | NS                   | NS                       | NS                        | NS                                                   | NS                                | <b>0.0498</b>                     | NS                              | NS                        |
| Vr                            | NS                   | <b>0.0027</b>            | <b>0.0044</b>             | NS                                                   | <b>0.0321</b>                     | <b>0.0291</b>                     | <b>0.0028</b>                   | <b>0.0028</b>             |
| <i>Interactions*</i>          |                      |                          |                           |                                                      |                                   |                                   |                                 |                           |
| PS:Vr                         | NS                   | NS                       | <b>0.0026<sup>1</sup></b> | NS                                                   | NS                                | NS                                | <b>0.0307<sup>1</sup></b>       | <b>0.0307<sup>1</sup></b> |

GAE, Gallic acid equivalent; TE, Trolox equivalent; **cyan**, cyanidin 3-glucoside equivalent; **mal**, malvidin 3-glucoside equivalent; *p*-values in *italic* are for trends (0.1 < *p* < 0.05); \* only interactions for which significant results were detected are shown; <sup>1</sup>see Table S5.1 for interaction means  $\pm$  SE;

**Table S4.1** Interactions means  $\pm$  SE for the effects of grape variety and production systems on the total anthocyanin content and sugar content in table grapes.

| Parameter                                             | Factor 1        | Factor 2                 |                          |
|-------------------------------------------------------|-----------------|--------------------------|--------------------------|
|                                                       | Grape Variety   | Production System        |                          |
|                                                       |                 | Organic                  | Conventional             |
| Sugar content (juice Brix <sup>o</sup> )              | Autumn Royal    | 14.6 $\pm$ 0.7 <b>aA</b> | 16.4 $\pm$ 0.8 <b>aA</b> |
|                                                       | Midnight Beauty | 19.4 $\pm$ 0.4 <b>bB</b> | 16.6 $\pm$ 0.9 <b>aA</b> |
| Total anthocyanin content (mg cyan kg <sup>-1</sup> ) | Autumn Royal    | 177 $\pm$ 36 <b>aA</b>   | 297 $\pm$ 99 <b>aA</b>   |
|                                                       | Midnight Beauty | 851 $\pm$ 110 <b>aB</b>  | 499 $\pm$ 64 <b>bA</b>   |
| Total anthocyanin content (mg mal kg <sup>-1</sup> )  | Autumn Royal    | 187 $\pm$ 38 <b>aB</b>   | 313 $\pm$ 104 <b>aA</b>  |
|                                                       | Midnight Beauty | 898 $\pm$ 116 <b>aA</b>  | 528 $\pm$ 67 <b>bA</b>   |

cyan, cyanidin 3-glucoside equivalent; mal, malvidin 3-glucoside equivalent; For each parameter assessed means labelled with the same lower case letter within the same row and the same capital letters within the same column are not significant different (General Linear Hypothesis test *p* < 0.05).

**Table S5.** Effect of, and interaction between, production system and table grape variety on the dry matter content (DM), sugar content (SC) of pulp/juice, total phenolic content (TPC), total antioxidant activity (TAA; DPPH & TEAC assays) and total anthocyanin content (TAC) in **red** table grapes produced in Mediterranean countries from a UK supermarket survey carried out in 2016 (2-factor ANOVA, the values presented are means  $\pm$  SE)

| Factors                       | Dry Matter content % | Sugar content (SC)       |                           | Total phenolic content (TPC) mg GAE kg <sup>-1</sup> | Antioxidant activity (TAA)        |                                   | Total anthocyanin content (TAC) |                         |
|-------------------------------|----------------------|--------------------------|---------------------------|------------------------------------------------------|-----------------------------------|-----------------------------------|---------------------------------|-------------------------|
|                               |                      | (pulp) Brix <sup>o</sup> | (juice) Brix <sup>o</sup> |                                                      | DPPH $\mu$ mol TE g <sup>-1</sup> | TEAC $\mu$ mol TE g <sup>-1</sup> | mg cyan kg <sup>-1</sup>        | mg mal kg <sup>-1</sup> |
| <b>Production system (PS)</b> |                      |                          |                           |                                                      |                                   |                                   |                                 |                         |
| Organic (n=7)                 | 40 $\pm$ 2           | 18.8 $\pm$ 0.6           | 19.1 $\pm$ 0.5            | 2033 $\pm$ 139                                       | 142 $\pm$ 3                       | 5.4 $\pm$ 0.6                     | 78 $\pm$ 8                      | 82 $\pm$ 9              |
| Conventional (n=7)            | 40 $\pm$ 2           | 18.5 $\pm$ 1.0           | 19.2 $\pm$ 0.7            | 2230 $\pm$ 148                                       | 140 $\pm$ 1                       | 5.8 $\pm$ 0.4                     | 175 $\pm$ 43                    | 184 $\pm$ 46            |
| <b>Variety (Vr)</b>           |                      |                          |                           |                                                      |                                   |                                   |                                 |                         |
| Allison (n=5)                 | 40 $\pm$ 2           | 18.3 $\pm$ 0.5           | 18.8 $\pm$ 0.5            | 2058 $\pm$ 140                                       | 143 $\pm$ 2                       | 6.4 $\pm$ 0.4                     | 127 $\pm$ 41                    | 134 $\pm$ 43            |
| Crimson (n=9)                 | 40 $\pm$ 2           | 18.8 $\pm$ 0.8           | 19.3 $\pm$ 0.6            | 2172 $\pm$ 141                                       | 140 $\pm$ 2                       | 5.2 $\pm$ 0.5                     | 126 $\pm$ 34                    | 133 $\pm$ 35            |
| <b>ANOVA (p-values)</b>       |                      |                          |                           |                                                      |                                   |                                   |                                 |                         |
| <i>Main effects</i>           |                      |                          |                           |                                                      |                                   |                                   |                                 |                         |
| PS                            | NS                   | NS                       | NS                        | NS                                                   | NS                                | NS                                | NS                              | NS                      |
| Vr                            | NS                   | NS                       | NS                        | NS                                                   | NS                                | NS                                | NS                              | NS                      |
| <i>Interactions*</i>          |                      |                          |                           |                                                      |                                   |                                   |                                 |                         |
| PS:Vr                         | NS                   | NS                       | NS                        | NS                                                   | NS                                | NS                                | NS                              | NS                      |

GAE, Gallic acid equivalent; TE, Trolox equivalent; **cyan**, cyanidin 3-glucoside equivalent; **mal**, malvidin 3-glucoside equivalent; *p*-values in *italic* are for trends (0.1<*p*<0.05); \* only interactions for which significant results were detected are shown;

**Table S6.** Effect of, and interaction between, production region, production system and table grape variety on the dry matter content (DM), sugar content (SC) of pulp/juice, total phenolic content (TPC), total antioxidant activity (TAA; DPPH & TEAC assays) and total anthocyanin content (TAC) in **red** table grapes from a UK supermarket survey carried out in 2015 (2-factor ANOVA, the values presented are means  $\pm$  SE)

| Factors                        | Dry Matter content % | Sugar content (SC)        |                           | Total phenolic content (TPC) mg GAE kg <sup>-1</sup> | Antioxidant activity (TAA)        |                                   | Total anthocyanin content (TAC) |                           |
|--------------------------------|----------------------|---------------------------|---------------------------|------------------------------------------------------|-----------------------------------|-----------------------------------|---------------------------------|---------------------------|
|                                |                      | (pulp) Brix <sup>o</sup>  | (juice) Brix <sup>o</sup> |                                                      | DPPH $\mu$ mol TE g <sup>-1</sup> | TEAC $\mu$ mol TE g <sup>-1</sup> | mg cyan kg <sup>-1</sup>        | mg mal kg <sup>-1</sup>   |
| <b>Production region (PR)</b>  |                      |                           |                           |                                                      |                                   |                                   |                                 |                           |
| South Africa (n=35)            | 39 $\pm$ 1           | 18.4 $\pm$ 0.2            | 18.4 $\pm$ 0.2            | 1490 $\pm$ 74                                        | 83 $\pm$ 4                        | 5.2 $\pm$ 0.5                     | 111 $\pm$ 11                    | 117 $\pm$ 11              |
| Mediterranean (n=43)           | 36 $\pm$ 1           | 17.3 $\pm$ 0.2            | 17.6 $\pm$ 0.2            | 2095 $\pm$ 98                                        | 115 $\pm$ 6                       | 10.5 $\pm$ 0.9                    | 82 $\pm$ 9                      | 87 $\pm$ 9                |
| <b>Production system (PS)</b>  |                      |                           |                           |                                                      |                                   |                                   |                                 |                           |
| Organic (n=28)                 | 37 $\pm$ 1           | 17.7 $\pm$ 0.3            | 18.0 $\pm$ 0.3            | 2030 $\pm$ 129                                       | 104 $\pm$ 7                       | 9.3 $\pm$ 1.1                     | 81 $\pm$ 8                      | 86 $\pm$ 8                |
| Conventional (n=50)            | 38 $\pm$ 1           | 17.8 $\pm$ 0.2            | 17.9 $\pm$ 0.2            | 1708 $\pm$ 82                                        | 100 $\pm$ 5                       | 7.4 $\pm$ 0.8                     | 103 $\pm$ 10                    | 109 $\pm$ 10              |
| <b>Variety (Vr)</b>            |                      |                           |                           |                                                      |                                   |                                   |                                 |                           |
| Crimson (n=58)                 | 38 $\pm$ 1           | 17.8 $\pm$ 0.2            | 18.0 $\pm$ 0.2            | 1669 $\pm$ 63                                        | 101 $\pm$ 3                       | 7.8 $\pm$ 0.5                     | 97 $\pm$ 9                      | 102 $\pm$ 9               |
| Flame (n=20)                   | 35 $\pm$ 2           | 17.7 $\pm$ 0.3            | 17.8 $\pm$ 0.3            | 2272 $\pm$ 182                                       | 101 $\pm$ 14                      | 8.9 $\pm$ 2.0                     | 91 $\pm$ 9                      | 96 $\pm$ 10               |
| <b>ANOVA (<i>p</i>-values)</b> |                      |                           |                           |                                                      |                                   |                                   |                                 |                           |
| <i>Main effects</i>            |                      |                           |                           |                                                      |                                   |                                   |                                 |                           |
| PR                             | <b>0.0319</b>        | <b>0.0017</b>             | <b>0.0157</b>             | <b>&lt;0.0001</b>                                    | <b>0.0001</b>                     | <b>0.0003</b>                     | <b>0.0425</b>                   | <b>0.0425</b>             |
| PS                             | NS                   | NS                        | NS                        | NS                                                   | NS                                | NS                                | NS                              | NS                        |
| Vr                             | <b>0.0312</b>        | NS                        | NS                        | <b>&lt;0.0001</b>                                    | NS                                | NS                                | NS                              | NS                        |
| <i>Interactions*</i>           |                      |                           |                           |                                                      |                                   |                                   |                                 |                           |
| PR : PS                        | NS                   | NS                        | <b>0.0219<sup>1</sup></b> | NS                                                   | NS                                | NS                                | NS                              | NS                        |
| PR : Vr                        | NS                   | <b>0.0127<sup>2</sup></b> | <b>0.0228<sup>2</sup></b> | NS                                                   | <b>&lt;0.0001<sup>2</sup></b>     | <b>0.0004<sup>2</sup></b>         | NS                              | NS                        |
| PS : Vr                        | NS                   | NS                        | NS                        | NS                                                   | NS                                | NS                                | <b>0.0182<sup>3</sup></b>       | <b>0.0182<sup>3</sup></b> |
| PR : PS : Vr                   | NS                   | NS                        | <b>0.0442<sup>4</sup></b> | NS                                                   | NS                                | NS                                | NS                              | NS                        |

GAE, Gallic acid equivalent; TE, Trolox equivalent; cyan, cyanidin 3-glucoside equivalent; mal, malvidin 3-glucoside equivalent; *p*-values in *italic* are for trends (0.1 < *p* < 0.05); \* only interactions for which significant results were detected are shown; <sup>1</sup> see Table S6.1 for interaction means  $\pm$  SE; <sup>2</sup> see Table S6.2 for interaction means  $\pm$  SE; <sup>3</sup> see Table S6.3 for interaction means  $\pm$  SE; <sup>4</sup> see Table S6.4 for interaction means  $\pm$  SE;

**Table S6.1** Interactions means  $\pm$  SE for the effects of production system and season on the sugar content in table grapes.

| Parameter                      | Factor 1          | Factor 2<br>Production System |                          |
|--------------------------------|-------------------|-------------------------------|--------------------------|
|                                | Production region | Organic                       | Conventional             |
| Sugar content<br>(juice Brix°) | South Africa      | 19.2 $\pm$ 0.4 <b>aA</b>      | 18.0 $\pm$ 0.3 <b>bA</b> |
|                                | Mediterranean     | 17.4 $\pm$ 0.3 <b>aB</b>      | 17.7 $\pm$ 0.3 <b>aA</b> |

For each parameter assessed means labelled with the same lower case letter within the same row and the same capital letters within the same column are not significant different (General Linear Hypothesis test  $p < 0.05$ ).

**Table S6.2** Interactions means  $\pm$  SE for the effects of grape variety and season on the sugar content and antioxidant activity (TEAC, DPPH) in table grapes.

| Parameter                                                  | Factor 1      | Factor 2<br>Production region |                          |
|------------------------------------------------------------|---------------|-------------------------------|--------------------------|
|                                                            | Grape Variety | Mediterranean                 | South Africa             |
| Sugar content<br>(pulp Brix°)                              | Crimson       | 17.1 $\pm$ 0.2 <b>bA</b>      | 18.6 $\pm$ 0.3 <b>aA</b> |
|                                                            | Flame         | 17.8 $\pm$ 0.4 <b>aA</b>      | 17.6 $\pm$ 0.5 <b>aA</b> |
| Sugar content<br>(juice Brix°)                             | Crimson       | 17.5 $\pm$ 0.2 <b>aA</b>      | 18.6 $\pm$ 0.3 <b>bA</b> |
|                                                            | Flame         | 17.9 $\pm$ 0.5 <b>aA</b>      | 17.7 $\pm$ 0.4 <b>aA</b> |
| Antioxidant activity<br>(TEAC, $\mu\text{mol TE g}^{-1}$ ) | Crimson       | 9.1 $\pm$ 0.7 <b>aB</b>       | 6.7 $\pm$ 0.7 <b>bA</b>  |
|                                                            | Flame         | 15.0 $\pm$ 2.8 <b>aA</b>      | 2.7 $\pm$ 0.3 <b>bA</b>  |
| Antioxidant activity<br>(DPPH, $\mu\text{mol TE g}^{-1}$ ) | Crimson       | 104 $\pm$ 4 <b>aB</b>         | 96 $\pm$ 1 <b>bA</b>     |
|                                                            | Flame         | 151 $\pm$ 16 <b>aA</b>        | 52 $\pm$ 1 <b>bB</b>     |

For each parameter assessed means labelled with the same lower case letter within the same row and the same capital letters within the same column are not significant different (General Linear Hypothesis test  $p < 0.05$ ).

**Table S6.3** Interactions means  $\pm$  SE for the effects of grape variety and production system on the total anthocyanin content in table grapes.

| Parameter                                                | Factor 1      | Factor 2<br>Production System |                        |
|----------------------------------------------------------|---------------|-------------------------------|------------------------|
|                                                          | Grape Variety | Organic                       | Conventional           |
| Total anthocyanin content<br>(mg cyan $\text{kg}^{-1}$ ) | Crimson       | 68 $\pm$ 9 <b>bA</b>          | 110 $\pm$ 12 <b>aA</b> |
|                                                          | Flame         | 108 $\pm$ 15 <b>aA</b>        | 76 $\pm$ 10 <b>aB</b>  |
| Total anthocyanin content<br>(mg mal $\text{kg}^{-1}$ )  | Crimson       | 72 $\pm$ 9 <b>bA</b>          | 116 $\pm$ 12 <b>aA</b> |
|                                                          | Flame         | 115 $\pm$ 16 <b>aA</b>        | 80 $\pm$ 10 <b>aB</b>  |

**cyan**, cyanidin 3-glucoside equivalent; **mal**, malvidin 3-glucoside equivalent; For each parameter assessed means labelled with the same lower case letter within the same row and the same capital letters within the same column are not significant different (General Linear Hypothesis test  $p < 0.05$ ).

**Table S6.4** Interactions means  $\pm$  SE for the effects of production system, season and grape variety on the sugar content in table grapes.

| Parameter                      | Factor 1          | Factor 2      | Factor 3<br>Production System |                          |
|--------------------------------|-------------------|---------------|-------------------------------|--------------------------|
|                                | Production region | Grape Variety | Organic                       | Conventional             |
| Sugar content<br>(juice Brix°) | Mediterranean     | Crimson       | 16.9 $\pm$ 0.3 <b>aB</b>      | 17.8 $\pm$ 0.3 <b>aA</b> |
|                                |                   | Flame         | 18.5 $\pm$ 0.5 <b>aA</b>      | 17.5 $\pm$ 0.8 <b>aA</b> |
|                                | South Africa      | Crimson       | 19.9 $\pm$ 0.3 <b>aA</b>      | 18.2 $\pm$ 0.3 <b>bA</b> |
|                                |                   | Flame         | 18.1 $\pm$ 0.3 <b>aA</b>      | 17.4 $\pm$ 0.7 <b>aA</b> |

For each parameter assessed means labelled with the same lower case letter within the same row and the same capital letters within the same column are not significant different (General Linear Hypothesis test  $p < 0.05$ ).

**Table S7.** Effect of, and interaction between, year, production system and grape type on the content of individual anthocyanins in red table grapes produced in Mediterranean countries from a UK supermarket survey 2015 (3-factor ANOVA, the values presented are means  $\pm$  SE).

| Factor                        | Concentrations of individual anthocyanins (mg FW kg <sup>-1</sup> ) |                                |                                |                               |                               |                                              |                                              |
|-------------------------------|---------------------------------------------------------------------|--------------------------------|--------------------------------|-------------------------------|-------------------------------|----------------------------------------------|----------------------------------------------|
|                               | delphinidin<br>3-O-<br>glucoside                                    | cyanindin<br>3-O-<br>glucoside | petunidin<br>3-O-<br>glucoside | peonidin<br>3-O-<br>glucoside | malvidin<br>3-O-<br>glucoside | peonidin<br>3-O-p-<br>coumaroyl<br>glucoside | malvidin<br>3-O-p-<br>coumaroyl<br>glucoside |
| <b>Production system (PS)</b> |                                                                     |                                |                                |                               |                               |                                              |                                              |
| Organic (n=10)                | 14.7 $\pm$ 6.9                                                      | 26 $\pm$ 11                    | 12.5 $\pm$ 5.6                 | 122 $\pm$ 20                  | 47 $\pm$ 15                   | 5 $\pm$ 2                                    | 1.4 $\pm$ 0.4                                |
| Conventional (n=9)            | 5.9 $\pm$ 2.1                                                       | 32 $\pm$ 10                    | 6.8 $\pm$ 1.8                  | 378 $\pm$ 106                 | 60 $\pm$ 13                   | 8 $\pm$ 3                                    | 2.3 $\pm$ 0.8                                |
| <b>Variety (Vr)</b>           |                                                                     |                                |                                |                               |                               |                                              |                                              |
| Crimson (n=11)                | 0.6 $\pm$ 0.2                                                       | 9 $\pm$ 2                      | 1.6 $\pm$ 0.5                  | 318 $\pm$ 95                  | 40 $\pm$ 14                   | 8 $\pm$ 2                                    | 2.0 $\pm$ 0.7                                |
| Flame (n=8)                   | 24.2 $\pm$ 6.7                                                      | 57 $\pm$ 11                    | 21.1 $\pm$ 4.9                 | 141 $\pm$ 24                  | 70 $\pm$ 13                   | 6 $\pm$ 2                                    | 1.5 $\pm$ 0.4                                |
| <b>ANOVA</b>                  |                                                                     |                                |                                |                               |                               |                                              |                                              |
| <i>p</i> -values              |                                                                     |                                |                                |                               |                               |                                              |                                              |
| <i>Main effects</i>           |                                                                     |                                |                                |                               |                               |                                              |                                              |
| PS                            | NS                                                                  | NS                             | NS                             | <b>0.0092</b>                 | NS                            | NS                                           | NS                                           |
| Vr                            | <b>0.0001</b>                                                       | <b>0.0001</b>                  | <b>&lt;0.0001</b>              | NS                            | NS                            | NS                                           | NS                                           |
| <i>Interactions*</i>          |                                                                     |                                |                                |                               |                               |                                              |                                              |
| PS : Vr                       | <b>0.0156<sup>1</sup></b>                                           | NS                             | <b>0.0104<sup>1</sup></b>      | <b>0.0335<sup>1</sup></b>     | <b>0.0044<sup>1</sup></b>     | <b>0.0216<sup>1</sup></b>                    | <b>0.0078<sup>1</sup></b>                    |

*p*-values in *italic* are for trends (0.1 < *p* < 0.05); \* only interactions for which significant results were detected are shown; <sup>1</sup> see Table S7.1 for interaction means  $\pm$  SE.

**Table S7.1** Interactions means  $\pm$  SE for the effects of grape variety and production system on the concentrations of individual anthocyanin compounds in red grapes produced in the Mediterranean (2015).

| Parameter                                                    | Factor 1<br>Variety | Factor 2<br>Production system                       |                    |
|--------------------------------------------------------------|---------------------|-----------------------------------------------------|--------------------|
|                                                              |                     | Organic                                             | Conventional       |
|                                                              |                     | delphinidin 3-O-glucoside (mg FW kg <sup>-1</sup> ) | Crimson            |
|                                                              | Flame               | 36.2 $\pm$ 10.5 a A                                 | 12.2 $\pm$ 1.7 b A |
| petunidin 3-O-glucoside (mg FW kg <sup>-1</sup> )            | Crimson             | 0.8 $\pm$ 0.4 a B                                   | 2.6 $\pm$ 0.9 a B  |
|                                                              | Flame               | 30.2 $\pm$ 7.8 a A                                  | 12.1 $\pm$ 1.2 b A |
| peonidin 3-O-glucoside (mg FW kg <sup>-1</sup> )             | Crimson             | 120 $\pm$ 20 b A                                    | 555 $\pm$ 151 a A  |
|                                                              | Flame               | 126 $\pm$ 45 b A                                    | 157 $\pm$ 24 a B   |
| malvidin 3-O-glucoside (mg FW kg <sup>-1</sup> )             | Crimson             | 15 $\pm$ 5 b A                                      | 71 $\pm$ 23 a A    |
|                                                              | Flame               | 96 $\pm$ 19 a A                                     | 46 $\pm$ 5 b A     |
| peonidin 3-O-p-coumaroyl glucoside (mg FW kg <sup>-1</sup> ) | Crimson             | 3.5 $\pm$ 1.1 b A                                   | 12.7 $\pm$ 3.9 a A |
|                                                              | Flame               | 8.3 $\pm$ 4.5 a A                                   | 3.1 $\pm$ 0.7 a B  |
| malvidin 3-O-p-coumaroyl glucoside (mg FW kg <sup>-1</sup> ) | Crimson             | 0.7 $\pm$ 0.3 b A                                   | 3.6 $\pm$ 1.2 a A  |
|                                                              | Flame               | 2.3 $\pm$ 0.7 a A                                   | 0.6 $\pm$ 0.1 a B  |

For each parameter assessed means labeled with the same lower case letter within the same row and same capital letters within the same column are not significant different (General Linear Hypothesis test *p* < 0.05).



**Table S8.** Effect of, and interaction between, year, production system and grape type on the content of individual anthocyanins in **red** table grapes produced in Mediterranean countries from a UK supermarket survey 2016 (3-factor ANOVA, the values presented are means  $\pm$  SE).

| Factor                        | Concentrations of individual anthocyanins (mg FW kg <sup>-1</sup> ) |                           |                          |                           |                         |                                    |                                    |
|-------------------------------|---------------------------------------------------------------------|---------------------------|--------------------------|---------------------------|-------------------------|------------------------------------|------------------------------------|
|                               | delphini-din 3-O-glucoside                                          | cyanin-din 3-O-glucoside  | petuni-din 3-O-glucoside | peoni-din 3-O-glucoside   | malvi-din 3-O-glucoside | peonidin 3-O-p-coumaroyl glucoside | malvidin 3-O-p-coumaroyl glucoside |
| <b>Production system (PS)</b> |                                                                     |                           |                          |                           |                         |                                    |                                    |
| Organic (n=5)                 | 0.2 $\pm$ 0.1                                                       | 8 $\pm$ 3                 | 0.5 $\pm$ 0.2            | 184 $\pm$ 24              | 20 $\pm$ 8              | 13 $\pm$ 7                         | 2.4 $\pm$ 1.4                      |
| Conventional (n=5)            | 0.8 $\pm$ 0.5                                                       | 28 $\pm$ 13               | 1.6 $\pm$ 0.9            | 238 $\pm$ 69              | 24 $\pm$ 8              | 9 $\pm$ 4                          | 0.9 $\pm$ 0.3                      |
| <b>Variety (Vr)</b>           |                                                                     |                           |                          |                           |                         |                                    |                                    |
| Crimson (n=6)                 | 0.2 $\pm$ 0.1                                                       | 36 $\pm$ 14               | 1.9 $\pm$ 1.1            | 300 $\pm$ 52              | 29 $\pm$ 10             | 25 $\pm$ 5                         | 3.5 $\pm$ 1.5                      |
| Allison (n=4)                 | 1.1 $\pm$ 0.7                                                       | 6 $\pm$ 1                 | 0.5 $\pm$ 0.2            | 152 $\pm$ 30              | 17 $\pm$ 5              | 2 $\pm$ 1                          | 0.4 $\pm$ 0.2                      |
| <b>ANOVA</b>                  |                                                                     |                           |                          |                           |                         |                                    |                                    |
| <i>p-values</i>               |                                                                     |                           |                          |                           |                         |                                    |                                    |
| <i>Main effects</i>           |                                                                     |                           |                          |                           |                         |                                    |                                    |
| PS                            | NS                                                                  | <b>0.0033</b>             | NS                       | NS                        | NS                      | NS                                 | NS                                 |
| Vr                            | NS                                                                  | NS                        | NS                       | NS                        | NS                      | NS                                 | NS                                 |
| <i>Interactions*</i>          |                                                                     |                           |                          |                           |                         |                                    |                                    |
| PS : Vr                       | NS                                                                  | <b>0.0033<sup>1</sup></b> | NS                       | <b>0.0106<sup>1</sup></b> | NS                      | <b>0.0442<sup>1</sup></b>          | <b>0.0144<sup>1</sup></b>          |

*p-values* in *italic* are for trends (0.1 < *p* < 0.05); \* only interactions for which significant results were detected are shown; <sup>1</sup> see Table S8.1 for interaction means  $\pm$  SE.

**Table S8.1** Interactions means  $\pm$  SE for the effects of grape variety and production system on the concentrations of individual anthocyanin compounds in red grapes produced in the Mediterranean (2016).

| Parameter                                                    | Factor 1<br>Variety | Factor 2<br>Production system |                           |
|--------------------------------------------------------------|---------------------|-------------------------------|---------------------------|
|                                                              |                     | Organic                       | Conventional              |
| cyanindin 3-O-glucoside (mg FW kg <sup>-1</sup> )            | Crimson             | 4 $\pm$ 1 <b>a A</b>          | 7 $\pm$ 2 <b>a B</b>      |
|                                                              | Allison             | 13 $\pm$ 5 <b>b A</b>         | 58 $\pm$ 8 <b>a A</b>     |
| peonidin 3-O-glucoside (mg FW kg <sup>-1</sup> )             | Crimson             | 163 $\pm$ 30 <b>a A</b>       | 140 $\pm$ 59 <b>a B</b>   |
|                                                              | Allison             | 214 $\pm$ 37 <b>b A</b>       | 386 $\pm$ 6 <b>a A</b>    |
| peonidin 3-O-p-coumaroyl glucoside (mg FW kg <sup>-1</sup> ) | Crimson             | 1.4 $\pm$ 0.2 <b>a B</b>      | 2.8 $\pm$ 1.4 <b>a B</b>  |
|                                                              | Allison             | 31.0 $\pm$ 4.4 <b>a A</b>     | 18.5 $\pm$ 4.8 <b>b A</b> |
| malvidin 3-O-p-coumaroyl glucoside (mg FW kg <sup>-1</sup> ) | Crimson             | 0.2 $\pm$ 0.0 <b>a B</b>      | 0.6 $\pm$ 0.3 <b>a A</b>  |
|                                                              | Allison             | 5.7 $\pm$ 1.7 <b>a A</b>      | 1.3 $\pm$ 0.4 <b>b A</b>  |

For each parameter assessed means labeled with the same lower case letter within the same row and same capital letters within the same column are not significant different (General Linear Hypothesis test *p* < 0.05).

**Table S9.** Effect of, and interaction between, year, production system and grape type on the content of individual anthocyanins in **black** table grapes produced in Mediterranean countries from a UK supermarket survey 2015 (3-factor ANOVA, the values presented are means  $\pm$  SE).

| Factor                        | Concentrations of individual anthocyanins (mg FW kg <sup>-1</sup> ) |                                |                                |                               |                               |                                              |                                              |
|-------------------------------|---------------------------------------------------------------------|--------------------------------|--------------------------------|-------------------------------|-------------------------------|----------------------------------------------|----------------------------------------------|
|                               | delphinidin<br>3-O-<br>glucoside                                    | cyanindin<br>3-O-<br>glucoside | petunidin<br>3-O-<br>glucoside | peonidin<br>3-O-<br>glucoside | malvidin<br>3-O-<br>glucoside | peonidin<br>3-O-p-<br>coumaroyl<br>glucoside | malvidin<br>3-O-p-<br>coumaroyl<br>glucoside |
| <b>Production system (PS)</b> |                                                                     |                                |                                |                               |                               |                                              |                                              |
| Organic (n=8)                 | 74 $\pm$ 27                                                         | 19 $\pm$ 11                    | 132 $\pm$ 39                   | 324 $\pm$ 105                 | 1334 $\pm$ 241                | 70 $\pm$ 14                                  | 534 $\pm$ 90                                 |
| Conventional (n=9)            | 32 $\pm$ 8                                                          | 14 $\pm$ 10                    | 72 $\pm$ 15                    | 172 $\pm$ 50                  | 1033 $\pm$ 156                | 51 $\pm$ 12                                  | 605 $\pm$ 172                                |
| <b>Variety (Vr)</b>           |                                                                     |                                |                                |                               |                               |                                              |                                              |
| Autumn royal (n=8)            | 34 $\pm$ 7                                                          | 19 $\pm$ 11                    | 68 $\pm$ 9                     | 258 $\pm$ 37                  | 935 $\pm$ 94                  | 68 $\pm$ 11                                  | 465 $\pm$ 90                                 |
| Midnight beauty (n=9)         | 68 $\pm$ 25                                                         | 14 $\pm$ 10                    | 130 $\pm$ 37                   | 233 $\pm$ 107                 | 1387 $\pm$ 236                | 53 $\pm$ 14                                  | 666 $\pm$ 166                                |
| <b>ANOVA</b>                  |                                                                     |                                |                                |                               |                               |                                              |                                              |
| <i>p-values</i>               |                                                                     |                                |                                |                               |                               |                                              |                                              |
| <i>Main effects</i>           |                                                                     |                                |                                |                               |                               |                                              |                                              |
| PS                            | NS                                                                  | NS                             | NS                             | NS                            | NS                            | NS                                           | NS                                           |
| Vr                            | NS                                                                  | NS                             | NS                             | NS                            | NS                            | NS                                           | NS                                           |
| <i>Interactions*</i>          |                                                                     |                                |                                |                               |                               |                                              |                                              |
| PS : Vr                       | NS                                                                  | NS                             | NS                             | <b>0.0278<sup>1</sup></b>     | NS                            | NS                                           | NS                                           |

*p-values* in *italic* are for trends ( $0.1 < p < 0.05$ ); \* only interactions for which significant results were detected are shown; <sup>1</sup> see Table S9.1 for interaction means  $\pm$  SE.

**Table S9.1** Interactions means  $\pm$  SE for the effects of grape variety and production system on the concentrations of individual anthocyanin compounds in red grapes produced in the Mediterranean (2016).

| Parameter                                            | Factor 1<br>Variety | Factor 2<br>Production system |                        |
|------------------------------------------------------|---------------------|-------------------------------|------------------------|
|                                                      |                     | Organic                       | Conventional           |
| Peonidin 3-O- glucoside (mg<br>FW kg <sup>-1</sup> ) | Autumn royal        | 201 $\pm$ 35 <b>aB</b>        | 314 $\pm$ 55 <b>aA</b> |
|                                                      | Midnight beauty     | 449 $\pm$ 201 <b>aA</b>       | 60 $\pm$ 9 <b>bA</b>   |

For each parameter assessed means labeled with the same lower case letter within the same row and same capital letters within the same column are not significant different (General Linear Hypothesis test  $p < 0.05$ ).

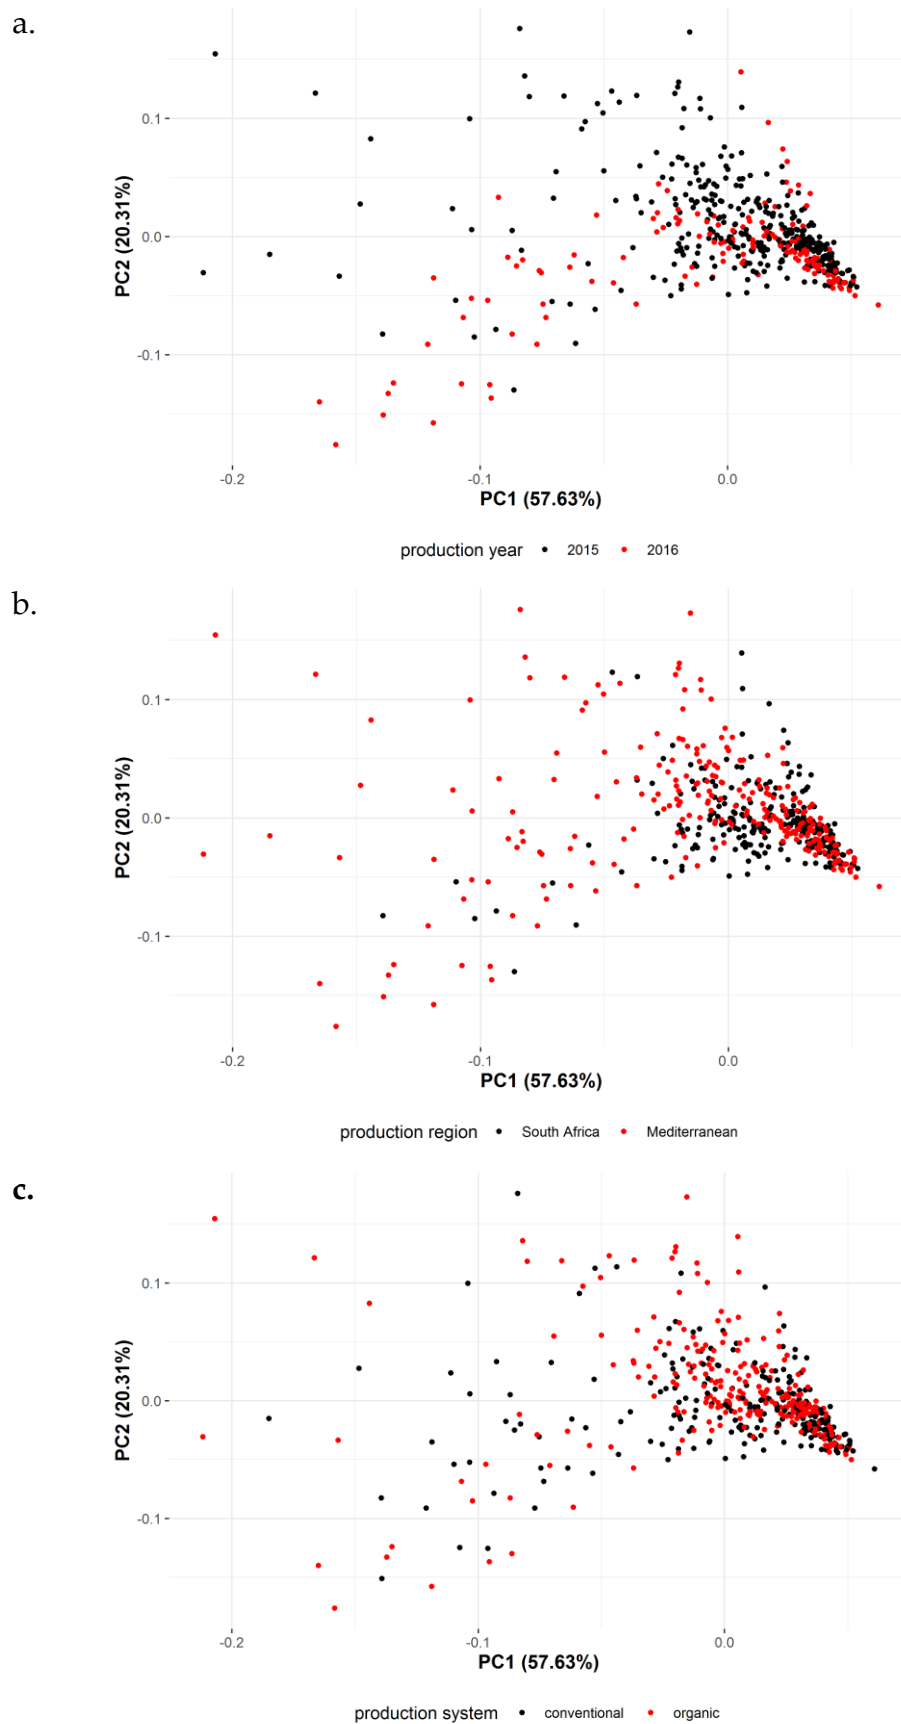

**Figure S1.** Principle component analyses of secondary metabolite concentration and antioxidant activity data showing the level of separation/variation between data from different (a) years (b) production regions and (c) production systems

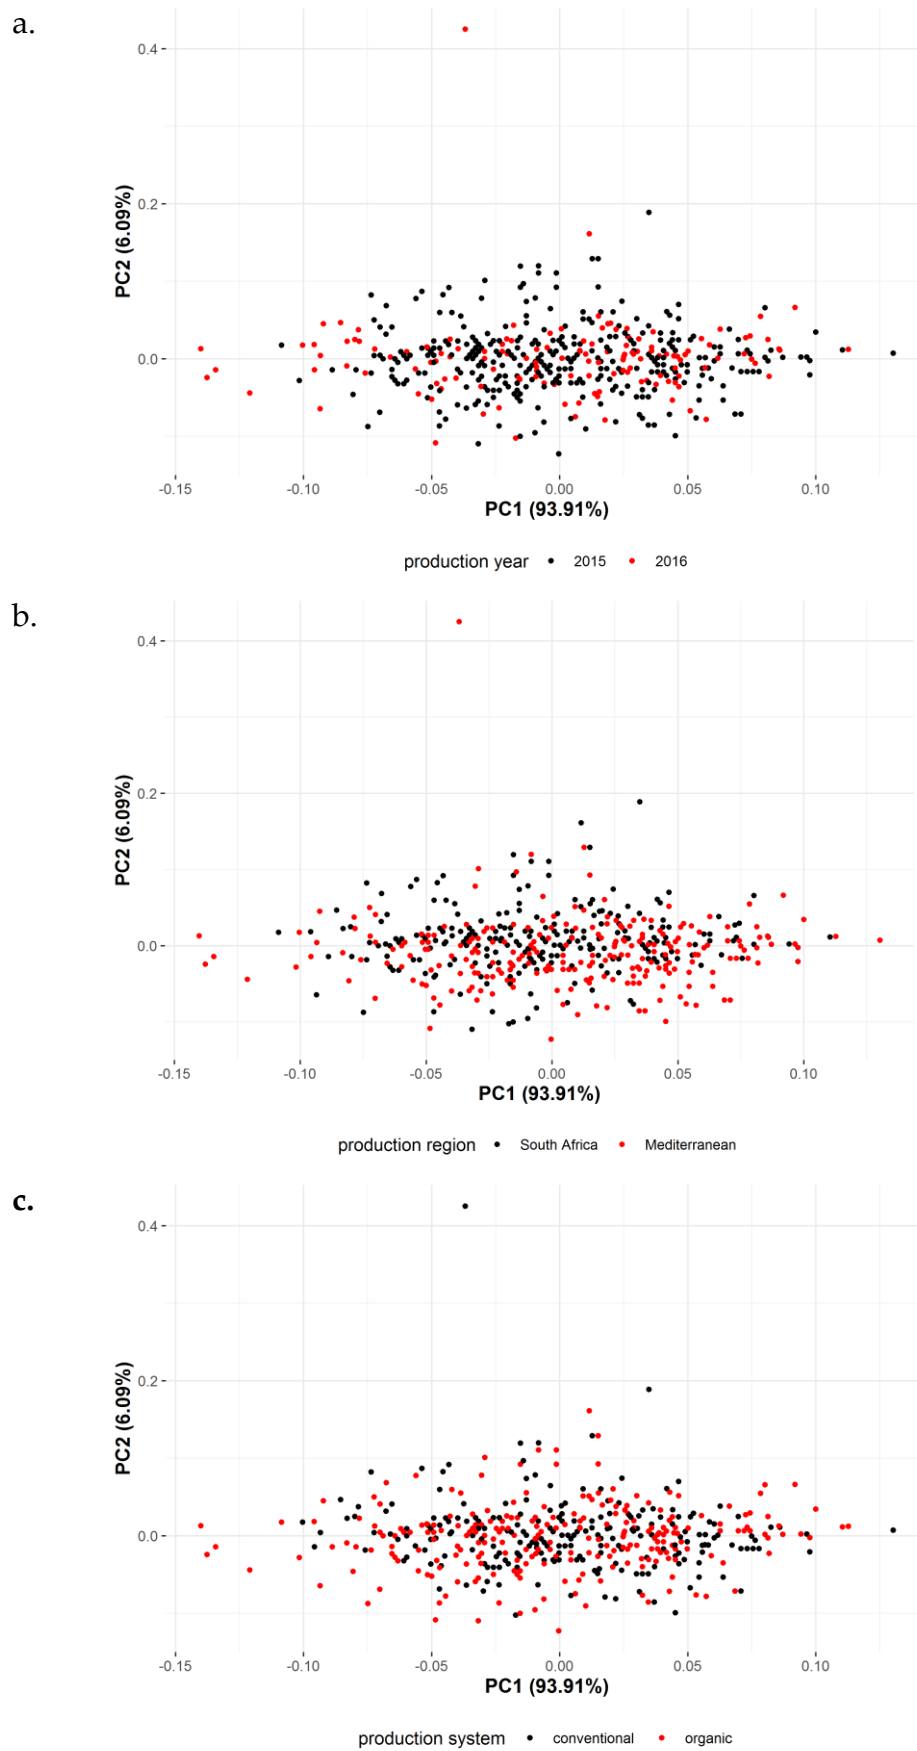

**Figure S2.** Principle component analyses of sugar content data showing the level of separation/variation between data from different (a) years (b) production regions and (c) production systems

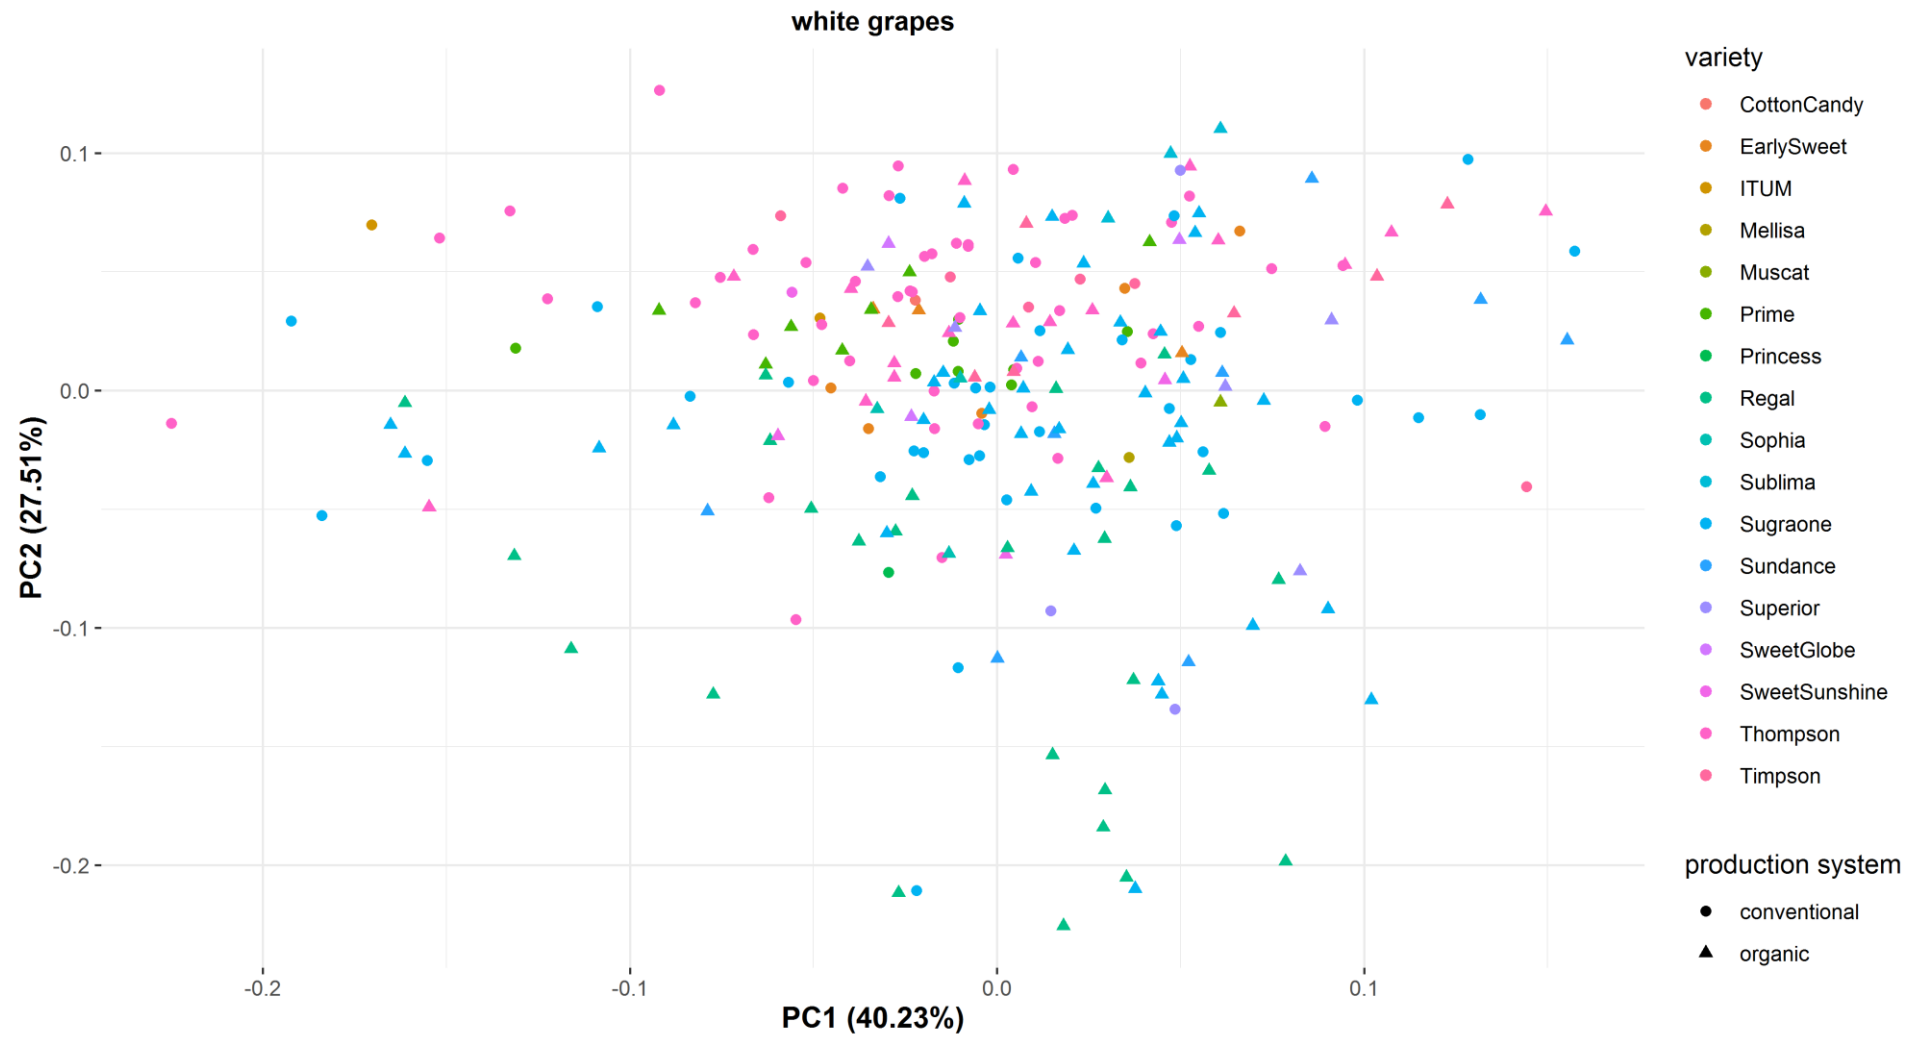

**Figure S3.** Principle component analyses secondary metabolite concentration and antioxidant activity data showing the separation/variation between black grape varieties and/or conventional and organic samples.

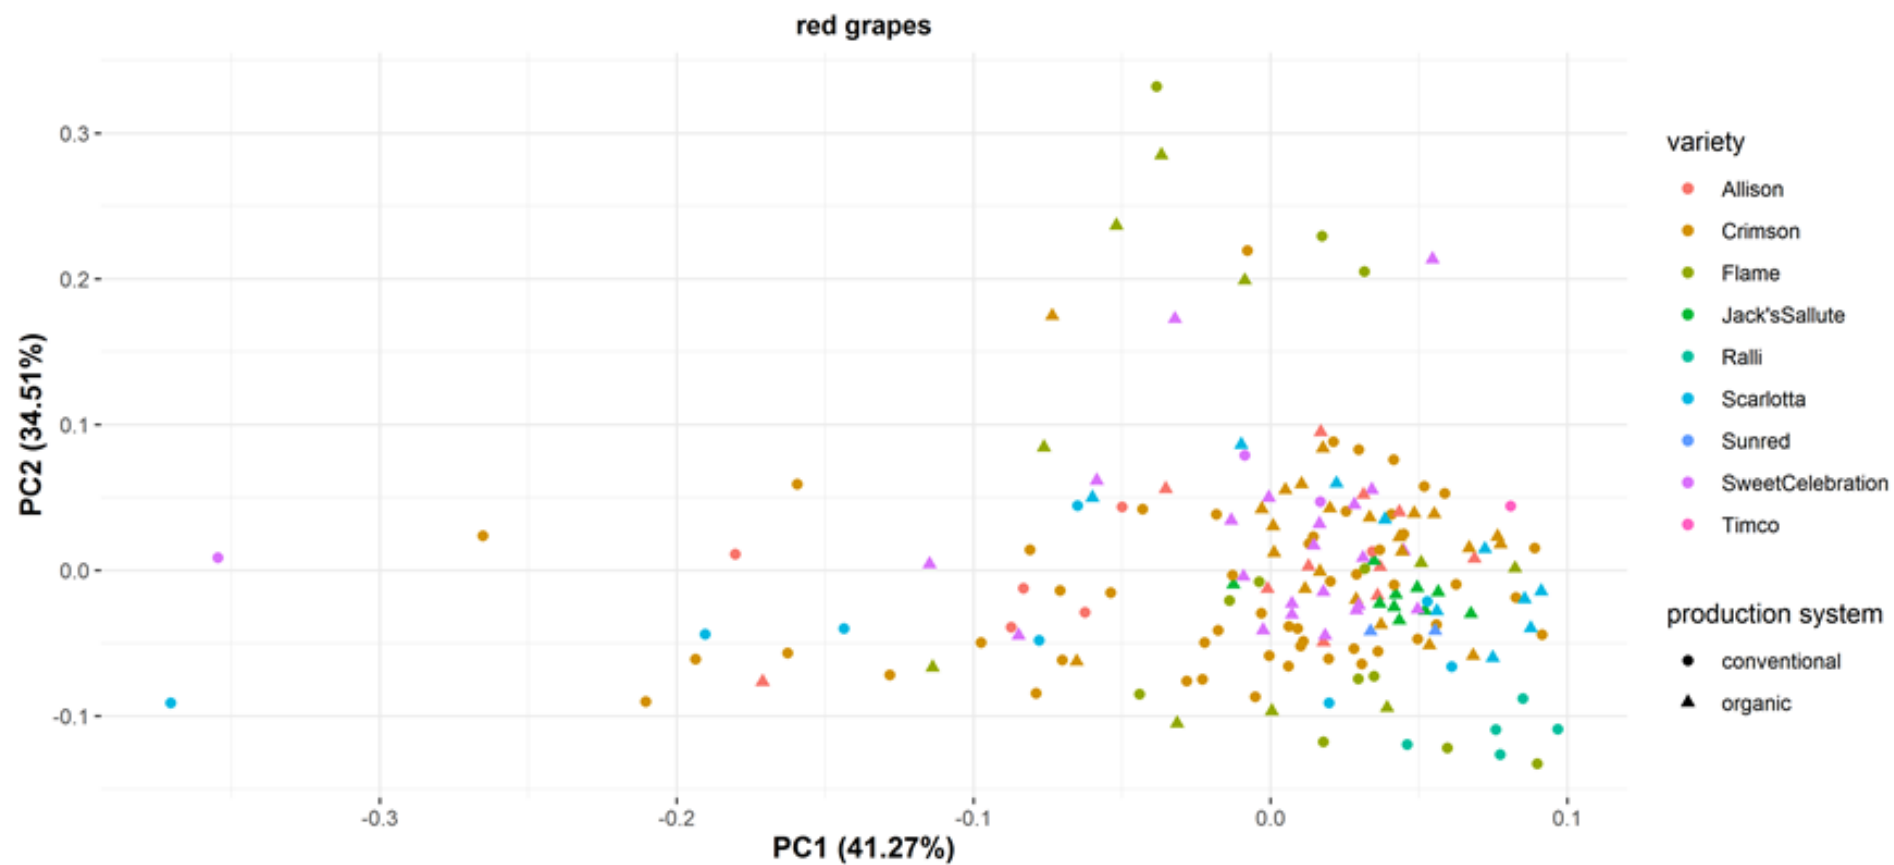

**Figure S4.** Principle component analyses secondary metabolite concentration and antioxidant activity data showing the separation/variation between red grape varieties and/or conventional and organic samples.

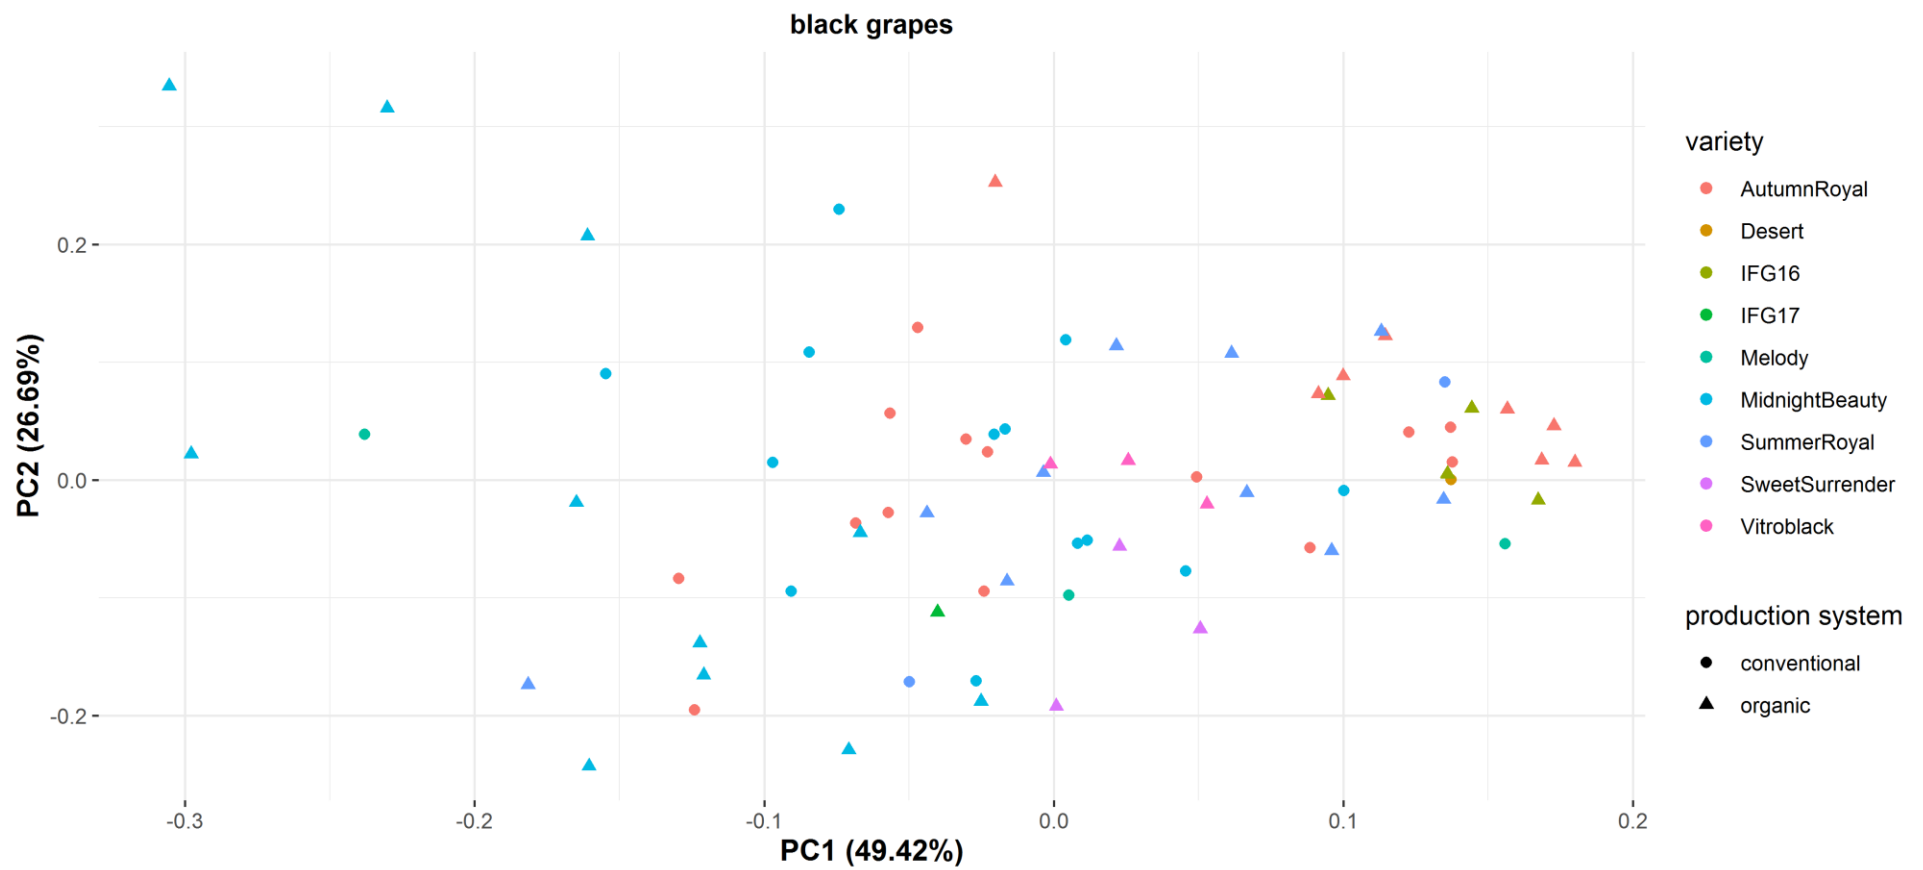

**Figure S5.** Principle component analyses secondary metabolite concentration and antioxidant activity data showing the separation/variation between black grape varieties and/or conventional and organic samples.
